1 **Title:** Pleiotropy drives repeatability in the genetic basis of adaptation

2

3 **Short running title:** Pleiotropy drives repeatability in adaptation

4

5 **Authors:** Paul Battlay<sup>1</sup>, Sam Yeaman<sup>2</sup>, Kathryn A. Hodgins<sup>1</sup>

6 1. School of Biological Sciences, Monash University, Melbourne, Victoria, Australia

7 2. Department of Biological Sciences, University of Calgary, Calgary, Alberta, Canada

8

9 **Corresponding author:** Paul Battlay; pbattlay@gmail.com

10

11 **Author contributions:** **Paul Battlay:** Data curation, Formal analysis, Investigation, Software,

12 Visualization, Writing - original draft, Writing - review & editing **Sam Yeaman:**

13 Conceptualization, Methodology, Supervision, Writing - review & editing **Kathryn A. Hodgins:**

14 Conceptualization, Funding acquisition, Methodology, Project administration, Supervision,

15 Writing - review & editing

16

17 **Acknowledgements:** We thank Tim Connallon and Jacqueline Sztepanacz for valuable

18 feedback on the manuscript. Funding was provided by a Human Frontier Science Program grant  
19 to KAH.

20

21 **Data Accessibility Statement:** Simulation Eidos scripts and analysis R code is available at

22 <https://github.com/pbattlay/pleio-sims/>

## 23 **Pleiotropy drives repeatability in the genetic basis of adaptation**

24 Paul Battlay<sup>1</sup>, Sam Yeaman<sup>2</sup>, Kathryn A. Hodgins<sup>1</sup>

25 1. School of Biological Sciences, Monash University, Melbourne, Victoria, Australia

26 2. Department of Biological Sciences, University of Calgary, Calgary, Alberta, Canada

27

### 28 **Abstract**

29 Studies of trait-mapping and local adaptation often identify signatures of genetically parallel  
30 evolution, where different species evolve similar phenotypes using the same genes. Such  
31 patterns appear incongruent with current estimations of quantitative trait architecture. With  
32 hundreds or thousands of genes contributing to a trait, why would selection make repeated use  
33 of the same genes? Here, we use individual-based simulations to explore a two-patch model  
34 with quantitative traits and pleiotropy to understand the parameters which may lead to repeated  
35 use of a particular locus during independent bouts of adaptation. We find that repeatability can  
36 be driven by increased phenotypic effect size, a reduction in trait dimensionality and a reduction  
37 in mutational correlations at a particular locus relative to other loci in the genome, and that these  
38 patterns are magnified by increased migration between demes. These results suggest that  
39 evolutionary convergence can arise from multiple characteristics of a locus, and provide a  
40 framework for the interpretation of quantitative signatures of convergence in empirical studies.

41

42 **Keywords:** pleiotropy, parallel evolution, repeatability, migration, simulations

## 43 **Introduction**

44 Studies of adaptation commonly observe convergent genetic responses, where multiple species  
45 independently respond to a given selection pressure with mutations in orthologous genes [1–4].  
46 These patterns imply a lack of redundancy in the genes available for a selective response [5,6],  
47 and at first glance seem inconsistent with another common observation: that variation in  
48 quantitative traits is explained by a very large number of alleles of small effect [7,8], which  
49 suggests a high level of redundancy in the genes contributing to quantitative traits.

50  
51 In the early 20th century, theoretical work by R. A. Fisher demonstrated that the continuous  
52 phenotypic variation observed in populations could be explained by a large number of alleles  
53 inherited in a Mendelian manner [7], and that selection would favor small-effect changes at large  
54 numbers of loci [9]. Genome-wide association studies in humans have provided empirical  
55 observations of standing variation congruent to Fisher’s models of adaptive trait architecture  
56 (reviewed in [10]): Associations with hundreds or thousands of genetic variants explain only a  
57 modest proportion of trait heritability, with the remaining heritability attributable to even larger  
58 numbers of variants with effect sizes too small to detect with current cohorts (or possibly to rare  
59 variants that are excluded from many such analyses). But if variation in thousands of genes  
60 underpins a given trait, why would we ever observe orthologous genes contributing to  
61 adaptation in multiple species, when there are seemingly a myriad of ways to construct the  
62 same traits?

63  
64 In his revisiting of Fisher’s model, Kimura [11] demonstrated that although smaller effect  
65 mutations are more likely to be favourable, beneficial mutations of small effect are less likely to  
66 fix, as genetic drift biases the contribution of intermediate-effect loci to adaptation. Later, Orr  
67 [12] showed that effect sizes of fixed adaptive mutations during an adaptive walk should be  
68 exponential, illustrating the importance of large-effect mutations early in bouts of adaptation to a  
69 new and distant environmental optimum. The omnigenic model (which posits that all genetic  
70 variants in genes expressed in the relevant cell type contribute to a phenotype; [8,13]) also  
71 makes the distinction between ‘core’ genes of larger effect and ‘peripheral’ genes of small effect  
72 (although the latter explains the bulk of trait heritability). Perhaps the simplest explanation for  
73 convergent genetic adaptation is if alleles of large effect are disproportionately likely to  
74 contribute to adaptation (e.g., because of their fixation probabilities), but only a subset of loci are  
75 able to generate alleles of large effect [14]. Convergence in gene use would then occur if there  
76 is long-term conservation of the genotype-phenotype map and the potential for particular loci to

77 generate alleles of large effect. Certainly, large-effect QTL have been identified in both  
78 experimental evolution studies (e.g. [15]) and natural populations (e.g. [16,17]), and genomic  
79 footprints of selective sweeps [18,19] provide evidence for strong selection at individual loci  
80 [20,21]. The effects of local adaptation on genetic architecture may further act to increase the  
81 likelihood of repeatability, as the contributions of small-effect alleles are disproportionately  
82 limited by the swamping effect of gene flow in populations connected by migration [22].  
83 Consequently, convergence in the genetic basis of local adaptation is expected to frequently  
84 involve large-effect mutations, particularly when gene flow is high or drift is strong, yet these  
85 processes do not overwhelm selection [6].

86

87 While alleles of large effect may be favoured early in adaptation or when there is migration-  
88 selection balance, their contribution to adaptation can be limited by pleiotropy. In both Fisher's  
89 [9] and Orr's [12] models, mutations are modelled as vectors in multidimensional phenotypic  
90 space; therefore mutations with a large effect in a favorable dimension generally deviate too far  
91 from the optima in other dimensions, with serious fitness consequences (e.g. [23]). Chevin,  
92 Martin & Lenormand [24] expanded these models to incorporate distinct genes which could vary  
93 in their pleiotropic properties: specifically the number of traits that mutations would affect, and  
94 the correlation in effects of mutations on different traits (the latter being a property that can arise  
95 from organization of genes into networks; [25]). They demonstrated that repeatability in the  
96 genetics of adaptation is an expected consequence of between-locus variation in pleiotropy;  
97 convergence may therefore be observed in genes where negative fitness effects of pleiotropy  
98 are minimized.

99

100 Previous models provide expectations for the contribution of pleiotropy and effect size to  
101 repeatability in isolated populations, however the interaction of these parameters with gene flow  
102 in locally-adapting populations has not been studied. This stands in contrast to the growing body  
103 of empirical work describing repeatability in locally-adapting populations and divergent lineages  
104 with gene flow [1–4]. To provide a theoretical grounding for such studies, we utilize individual-  
105 based simulations of quantitative trait evolution examining how the interplay between inter-locus  
106 heterogeneity in pleiotropy and migration-selection balance affects genetic convergence. We  
107 build on previous models, which have considered adaptation in a single population following an  
108 environmental shift, by introducing a second population adapting to a divergent environment,  
109 allowing the observation of interactions between migration, effect size and pleiotropy in bouts of  
110 local adaptation. We find that increasing effect size or decreasing pleiotropy (both the overall

111 dimensionality as well as mutational correlation) at a given QTL relative to the other QTL will  
112 increase repeatability. Moreover we find that increased migration between demes exacerbates  
113 the repeatability observed.

## 114 Simulations

115 To study the factors driving repeatability at particular loci in independent bouts of adaptation, we  
116 performed Wright-Fisher, forward-time simulations in SLiM (v. 3.3.1; [26]) with adaptation to a  
117 complex environment that varied across two patches connected by migration. Adaptation within  
118 each patch was driven by selection on two (or more) traits:  $Z_1$  with an optimum that varied  
119 among the patches, and one or more (e.g.  $Z_2$ ) with the same optimum in each patch.

120

121 To gain insight into the parameters capable of driving repeatability at a particular locus and their  
122 interaction, we simulated a simplified genome: Traits could be affected by mutations at five  
123 genetically unlinked QTL; recombination within QTL occurred at a rate of  $2.5 \times 10^{-7}$ . Properties  
124 were uniform across four QTL, while aberrant properties were assigned to a single ‘focal’ QTL,  
125 where parameter values could be varied independently of the non-focal QTL. For some  
126 parameters, simulations were repeated with a total of 20 QTL and one focal QTL (fig. S3). Each  
127 QTL consisted of 500bp, and mutations occurred at a rate of  $1 \times 10^{-7}$  per base pair per  
128 generation, resulting in an expected 10,000 mutations in each of two demes over the 20,000-  
129 generation simulation.

130

131 QTL mutations affected two or more phenotypes (e.g.  $Z_1$  and  $Z_2$ ); mutational effects for each  
132 QTL were drawn from a multivariate normal distribution with variance  $\sigma^2$ , which determines the  
133 QTL effect magnitude, and covariance which was equal to the QTL mutational correlation  
134 multiplied by  $\sigma^2$ .

135

136 The following Gaussian function related individual fitness to phenotype  $Z_i$ :

137

$$w_i = e^{-\frac{(\theta_i - \Sigma a_i)^2}{2V_s}} \quad (1)$$

138

139 where  $\theta_i$  = the phenotypic optimum and  $\Sigma a_i$  = the sum of mutation effects for phenotype  $Z_i$ , and  
140  $V_s$  = the variance in the fitness function, reflecting the strength of stabilizing selection (set at 125  
141 for all simulations). Overall individual fitness was calculated as the product of  $w$  across all  
142 phenotypes, so there was no correlational selection between pairs of phenotypes.

143

144 We simulated two demes ( $d_1$  and  $d_2$ ), each composed of 1000 randomly-mating diploid  
145 hermaphroditic individuals. Phenotypic space was unitless and provided a relative scaling for

146 the width of the fitness function and the magnitude of mutational effects. Both demes began the  
147 simulation with phenotypic optima of 0 for all phenotypes and ran with a burn-in for 20,000  
148 generations. After the burn-in, phenotypic optima were shifted and we tracked adaptive  
149 evolution over the following 20,000 generations. For most simulations, we focussed on the case  
150 where in  $d_1$  the optima for all phenotypes remained at 0, while in  $d_2$ , the optimum for  $Z_1$  was  
151 shifted to -10, while  $Z_2$  (and optima for any other phenotypes) remained at 0. We varied the  
152 migration rate between  $d_1$  and  $d_2$  (from 0 to 0.05) and  $\sigma^2$  (from 0.1 to 5), mutational correlations  
153 (from 0 to 0.99), and the number of phenotypes affected by the QTL.

154

155 We investigated three main ways in which the characteristics of the focal QTL could be  
156 differentiated from those of the other loci:

- 157 1) A change in  $\sigma^2$  by altering the variance component of the variance-covariance matrix  
158 used to generate mutations (fig. 1A cf. B). This parameter was used to model a  
159 large-effect QTL at the focal QTL.
- 160 2) A change in mutational correlation by altering the covariance component of the  
161 variance-covariance matrix (fig 1A cf. C). This parameter models dependence  
162 between phenotypes and determines the likelihood that a mutation's effect on one  
163 phenotype will have a corresponding effect on another.
- 164 3) A change in the number of phenotypes affected by a mutation by reducing the  
165 dimensionality of the variance-covariance matrix (fig. 1A cf. D). This models a  
166 situation where a QTL has no effect on one or more phenotypes..

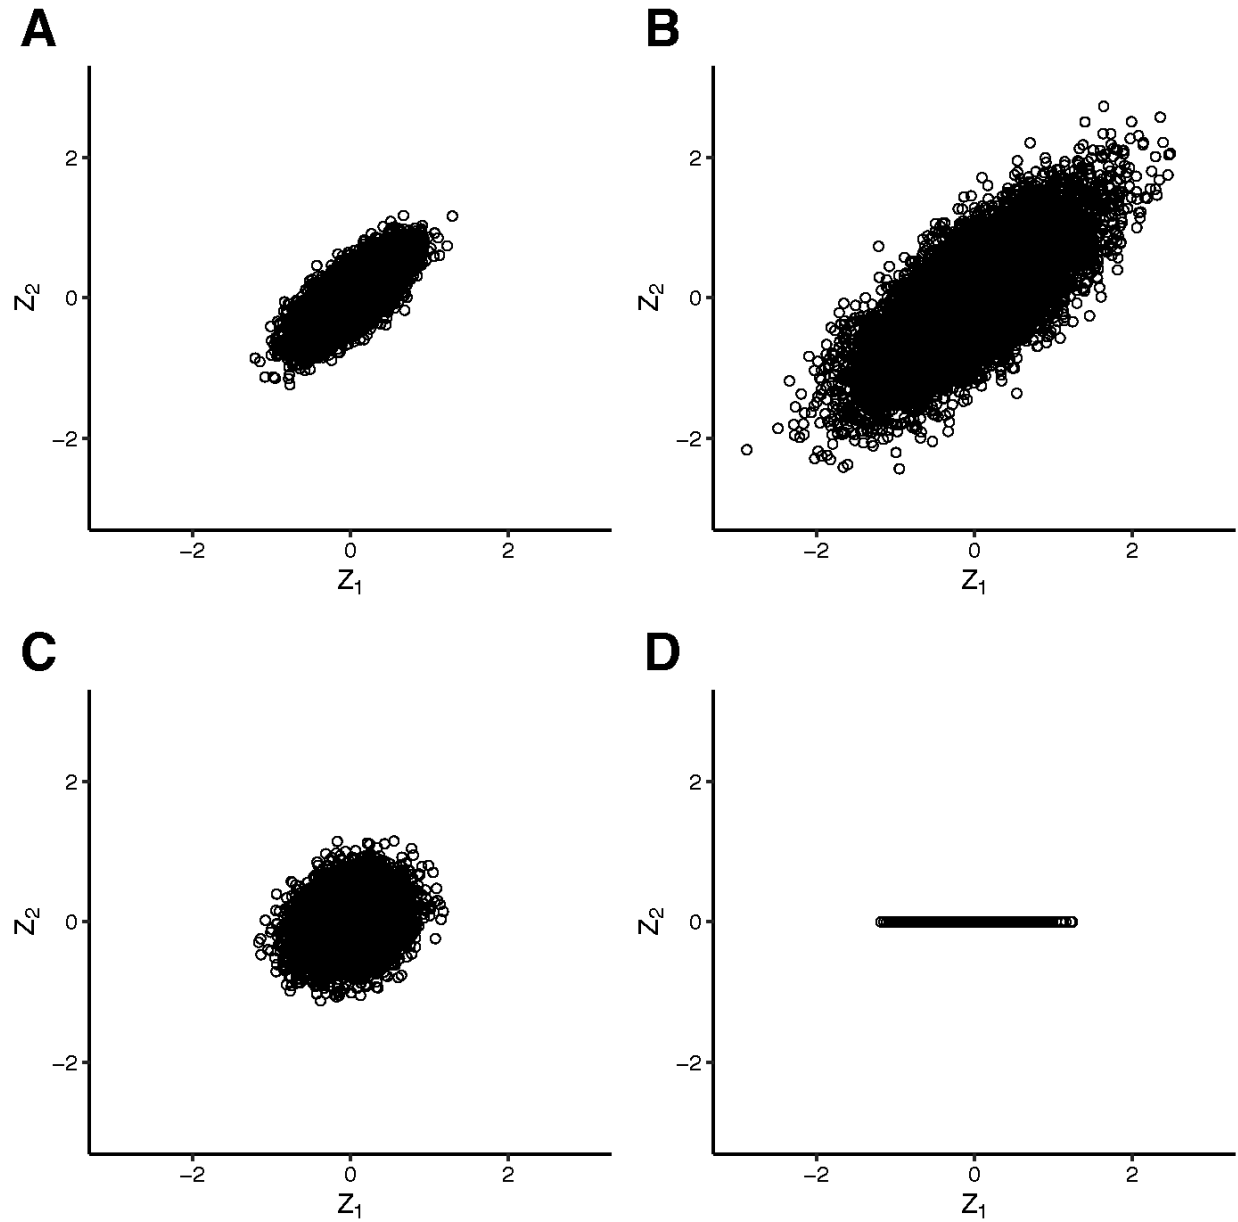

167

168 **Figure 1.** Effect sizes on  $Z_1$  (x-axes) and  $Z_2$  (y-axes) for 10,000 draws from distributions used to generate

169 mutations. In A,  $\sigma^2$  is 0.1 and the mutational correlation between traits is 0.75. In B, the mutational

170 correlation is the same as A (0.75) but  $\sigma^2$  is increased to 0.5. In C,  $\sigma^2$  is the same as A (0.1), but the

171 mutational correlation is relaxed to 0.25. In D, mutations have no effect on the non-divergent phenotype.



172 To interpret the results of each parameter combination, we calculated the genetic value ( $GV$ )  
173 that a given genomic region (e.g., a QTL) contributes to phenotypic divergence using the  
174 formula:

175

$$GV = \sum ((p_1 - p_2) \times a) \quad (2)$$

176

177 where  $p_1$  and  $p_2$  are the frequencies of a mutation in each deme, and  $a$  is the size of the  
178 mutation's effect on  $Z_1$ .

179

180 For each parameter combination we quantified the divergence (the difference in mean  
181 phenotypes) between demes  $d_1$  and  $d_2$  at the divergently selected phenotype with  $2 \times GV_{all}$  ( $GV$   
182 summed across all QTL), and quantified repeatability in the contributions of the QTL to trait  
183 divergence (measured by QTL-specific  $GV$ ) across 100 replicates using the  $C_{chisq}$  statistic with  
184 1000 permutations [6], implemented in the `dgconstraint` R package [6] with the  
185 `pairwise_c_chisq()` function (i.e., each replicate is treated as an independent bout of evolution).  
186 Briefly,  $\chi^2$  was calculated across simulation replicates with:

187

$$\chi^2 = \frac{\sum (G\bar{V}_n - \bar{G}\bar{V}_n)^2}{G\bar{V}_n} \quad (3)$$

188

189 where  $G\bar{V}_n$  is the sum across simulation replicates of  $GV$  for the  $n^{\text{th}}$  QTL, and  $\bar{G}\bar{V}_n$  is the mean  
190  $G\bar{V}_n$  across all QTL.

191

192 The  $C_{chisq}$  statistic was then calculated by using  $\chi^2$  and  $\chi^2_{sim}$ , the results of 1000 permutations of  
193 the data within each replicate:

194

$$C_{chisq} = \frac{\chi^2 - \text{mean}(\chi^2_{sim})}{\text{sd}(\chi^2_{sim})} \quad (4)$$

195

196 By this equation, when  $C_{chisq}=0$  we observe no more repeatability than would be expected by  
197 chance. The maximum value of  $C_{chisq}$  varies with the number of QTL modelled:  $C_{chisq}=2$  for five  
198 QTL and  $C_{chisq} \approx 4.36$  for 20 QTL.

199

200 Additionally, we calculated  $GV_{focal} / GV_{all}$ , the proportion of  $GV$  summed across all QTL  
201 explained by  $GV$  summed across the focal QTL.

## 202 **Results**

203 We began by examining the behavior of models with different arrangements of phenotypic  
204 optima, while increasing  $\alpha^2$  at the focal QTL and holding  $\alpha^2$  constant at non-focal QTL. Divergent  
205 optima result in divergent phenotypes (fig. 2B; C), although divergence to a heterogeneous  
206 optimum is constrained by high mutational correlations (fig. 2C), as found by Guillaume [27].  
207 QTL have equal probability of contributing to adaptation ( $C_{chisq}=0$ ) when all loci have the same  
208  $\alpha^2$  and mutational correlation (fig. 2 where focal QTL  $\alpha^2=0.1$ ), but repeatability was observed  
209 with any increase in focal QTL  $\alpha^2$  in models with divergent phenotypes (fig. 2). For the  
210 remainder of this study, we focus on the phenotypic arrangement in fig. 2C, where repeatability  
211 occurs but divergence is affected by mutational correlations (pleiotropy) between  
212 heterogeneous optima.

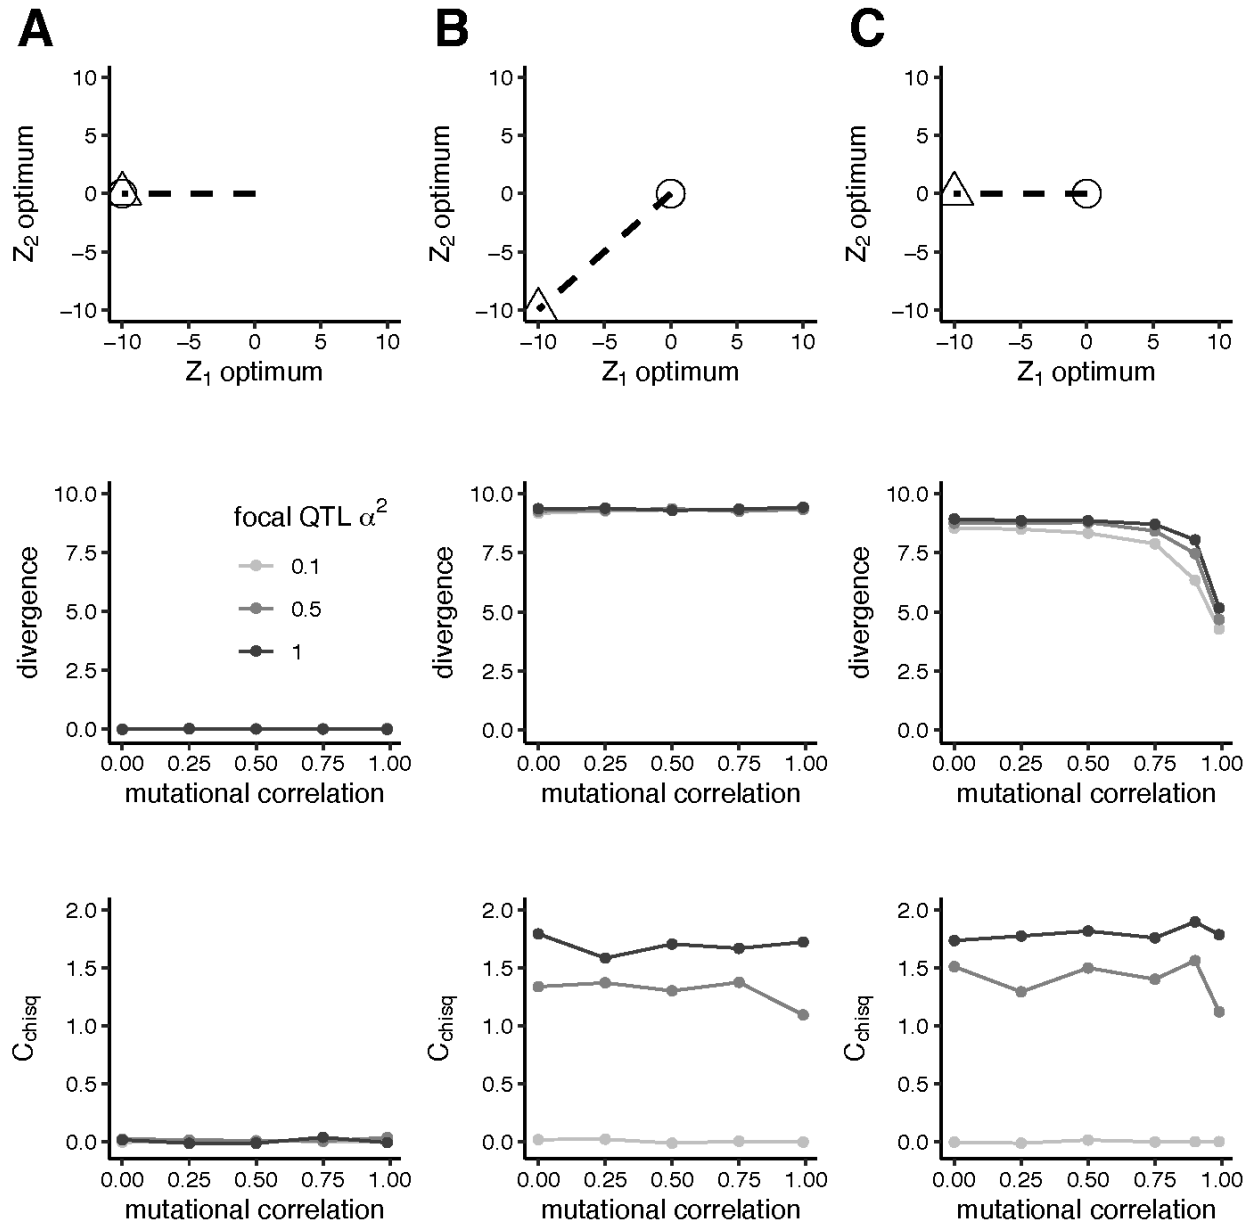

213

214 **Figure 2.** Divergence and repeatability ( $C_{chisq}$ ) in  $Z_1$  for three arrangements of phenotypic optima: A,  
 215 where  $d_1$  (circle) and  $d_2$  (triangle) both shift to a heterogeneous environment; B, where  $d_2$  alone shifts to a  
 216 homogeneous environment; C, where  $d_2$  alone shifts to a heterogeneous environment.  $\alpha^2$  at the focal QTL  
 217 is varied, while  $\alpha^2$  for non-focal QTL is 0.1. Mutational correlations are uniform at all QTL, and the  
 218 migration rate is 0.005. These simulations use two phenotypes (one divergent and one non-divergent),  
 219 and were run for 20,000 generations.

220 The repeatability observed with increased focal QTL  $\sigma^2$  was robust to variation in migration rate  
221 (fig. 3A), and was reflected by an increasing contribution of the focal QTL to divergence (fig.  
222 3C). While high mutational correlations impeded phenotypic divergence, comparable levels of  
223 repeatability were observed between high and low mutational correlations unless migration was  
224 absent (fig. 3A c.f. B). This is because high mutational correlations limit the rate of, but do not  
225 completely exclude the occurrence of mutations with fortuitous combinations of effects (fig.  
226 S2A). Furthermore, increasing migration rates resulted in increasing repeatability (fig. 3; fig. S1),  
227 and this pattern was exacerbated by increasing mutational correlations.

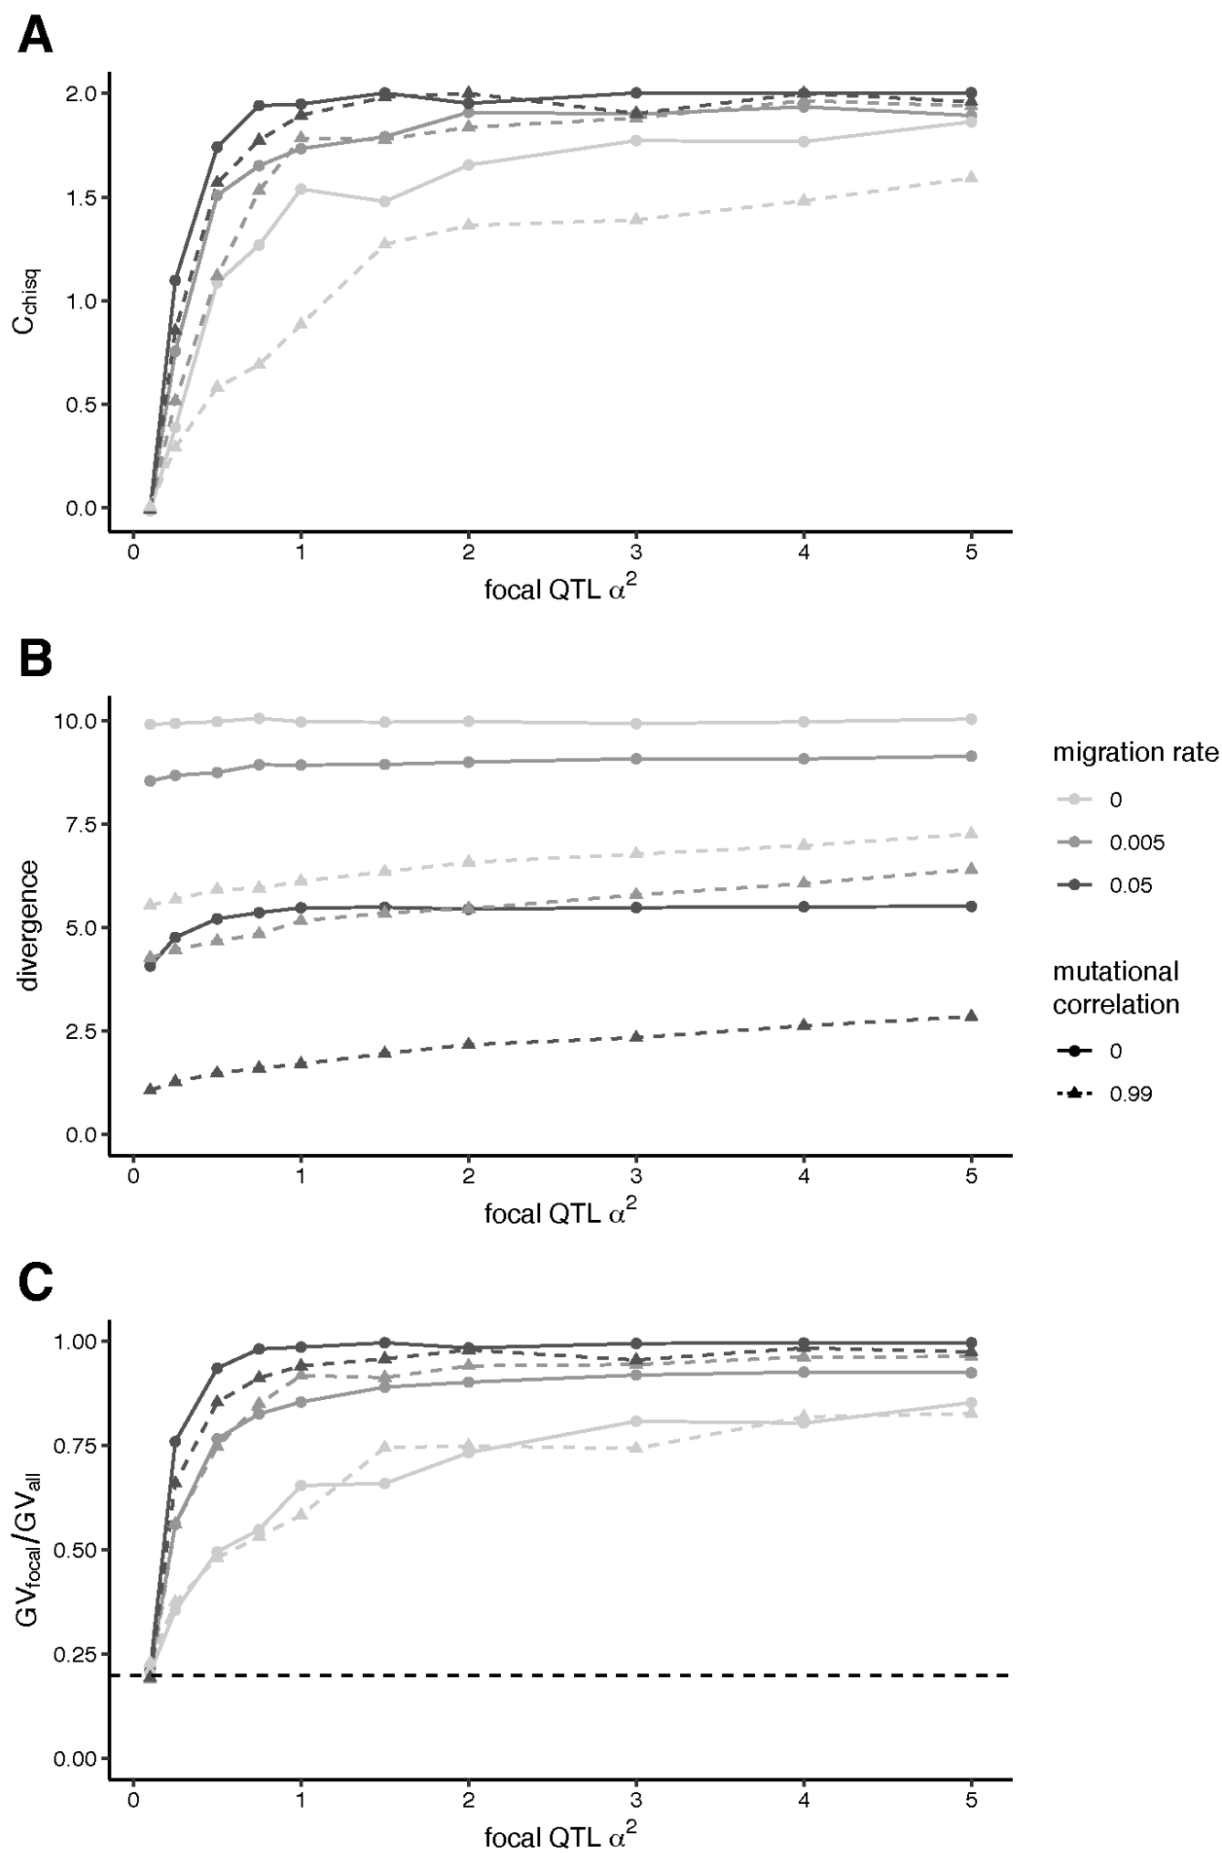

229 **Figure 3.** Repeatability ( $C_{chisq}$ ) in  $Z_1$  (A),  $Z_1$  phenotypic divergence ( $2 \times GV_{all}$ ) between  $d_1$  and  $d_2$  (B), and  
230 the corresponding mean proportion of all  $GV$  explained by  $GV$  at the focal QTL (C) against focal QTL  $\sigma^2$   
231 where the  $\sigma^2$  for non-focal QTL is 0.1. The dotted line indicates  $GV_{focal} / GV_{all} = 0.2$ , the point at which this  
232 value shifts from representing overuse of the focal QTL to underuse of the focal QTL. Mutational  
233 correlations between phenotypes at all QTL are 0 (circle points; solid lines) or 0.99 (triangle points;  
234 dashed lines). These simulations use two phenotypes (one divergent and one non-divergent), and were  
235 run for 20,000 generations.

236 Reducing the correlation in phenotypic effects at a given QTL may also allow it to more readily  
237 acquire adaptive mutations when the direction of change toward the optimum is not aligned with  
238 the correlation in phenotypic effects (thereby increasing its repeatability). We modeled this by  
239 independently varying mutational correlations at the focal and non-focal QTL (fig. 4; fig. S3), and  
240 observed repeatability where there were differences between mutational correlation values at  
241 focal and non-focal QTL (fig. 4). When the mutational correlation at the focal QTL was reduced  
242 relative to the non-focal QTL, repeatability involving the focal QTL increased, and when the  
243 mutational correlation at the focal QTL was increased relative to the non-focal QTL, repeatability  
244 involving the focal QTL decreased, although this latter observation was not robust to an  
245 increase in the number of QTL (fig. S4). High levels of repeatability were only seen when the  
246 focal QTL had a relaxed mutational correlation against a background of high mutational  
247 correlation at non-focal QTL (i.e. 0.75 and particularly 0.9). This reflects the fact that mutational  
248 correlations need to be high to significantly limit the availability of mutations with fortuitous  
249 combinations of effects (fig. S2B).



250

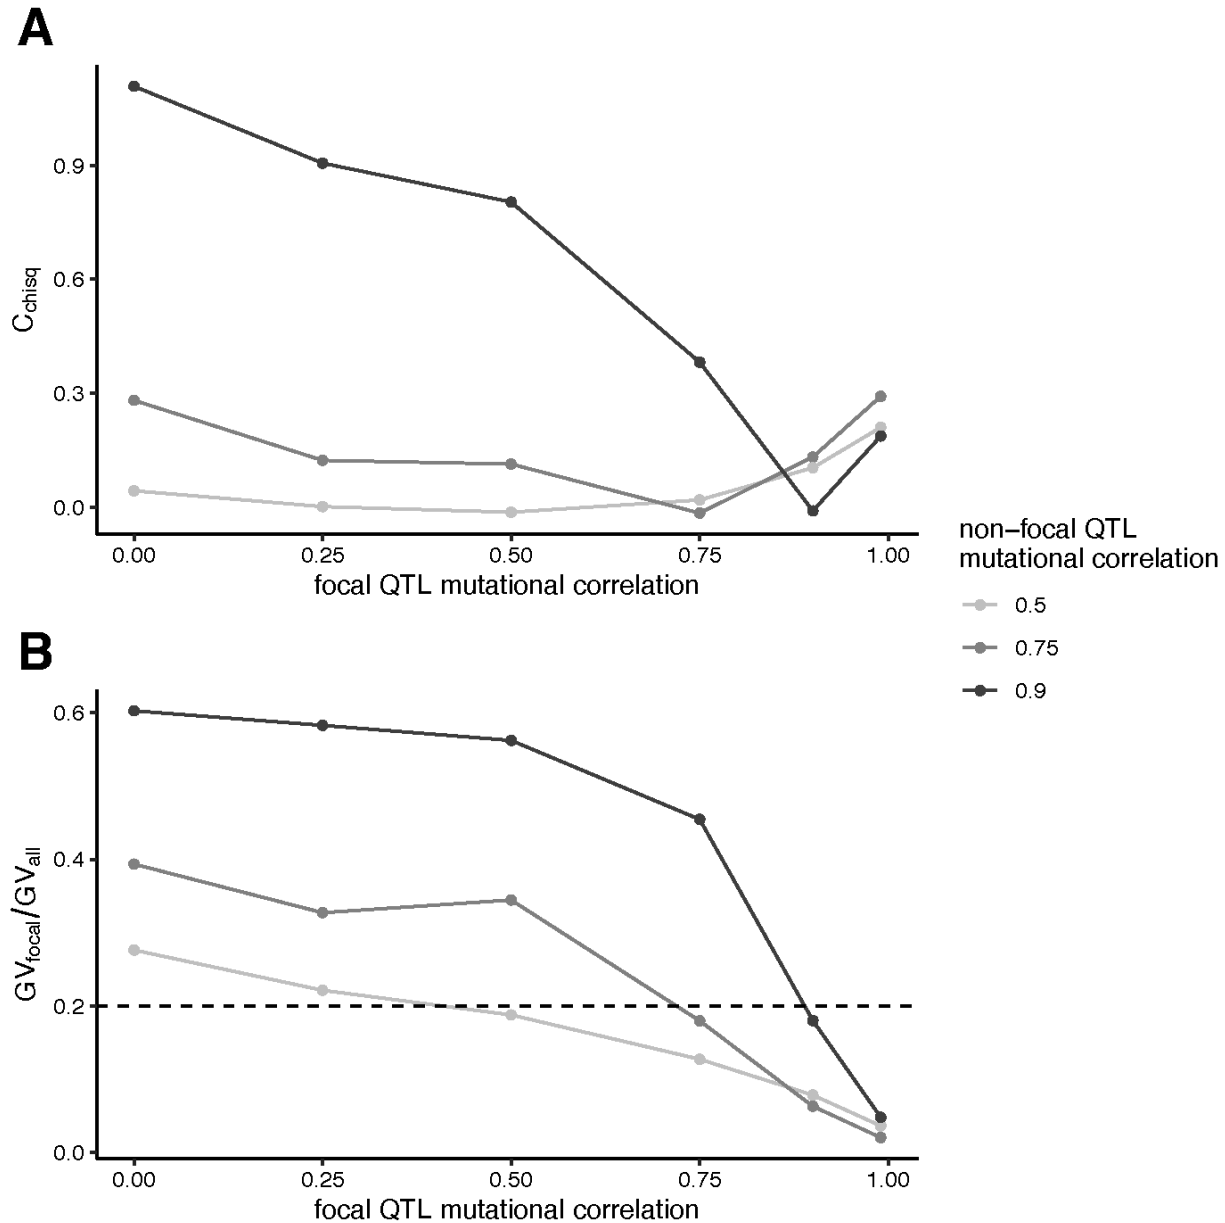

251

252 **Figure 4.** Repeatability ( $C_{chisq}$ ) in  $Z_1$  against focal QTL mutational correlation for varying values of non-  
253 focal QTL mutation correlation (A), and the corresponding mean proportion of all GV explained by GV at  
254 the focal QTL (B). The dotted line indicates  $GV_{focal} / GV_{all} = 0.2$ , the point at which this value shifts from  
255 representing overuse of the focal QTL to underuse of the focal QTL. These simulations use a migration  
256 rate of 0.005, an  $\sigma^2$  of 0.5 and two phenotypes (one divergent and one non-divergent), and were run for  
257 20,000 generations.

258 To assess the robustness of these observations to an increase in the dimensionality of the  
259 phenotypes under selection, we increased the number of non-divergent phenotypes from one to  
260 nine for the case where the non-focal QTL mutational correlation = 0.75, but saw only a very  
261 modest increase in repeatability (fig. 5A). Finally, we investigated the case where mutations at  
262 the focal QTL affect fewer phenotypes than the non-focal QTL. In the two-phenotype model, this  
263 meant focal QTL mutations would only affect the divergent phenotype; in the five and ten-  
264 phenotype models, focal QTL mutations affected the divergent phenotype and one fewer non-  
265 divergent phenotypes than non-focal QTL. With high mutational correlation between phenotypic  
266 effects, high levels of repeatability at the focal QTL are observed, however when mutational  
267 correlations are weak or absent, very little repeatability is observed (fig. 5B).

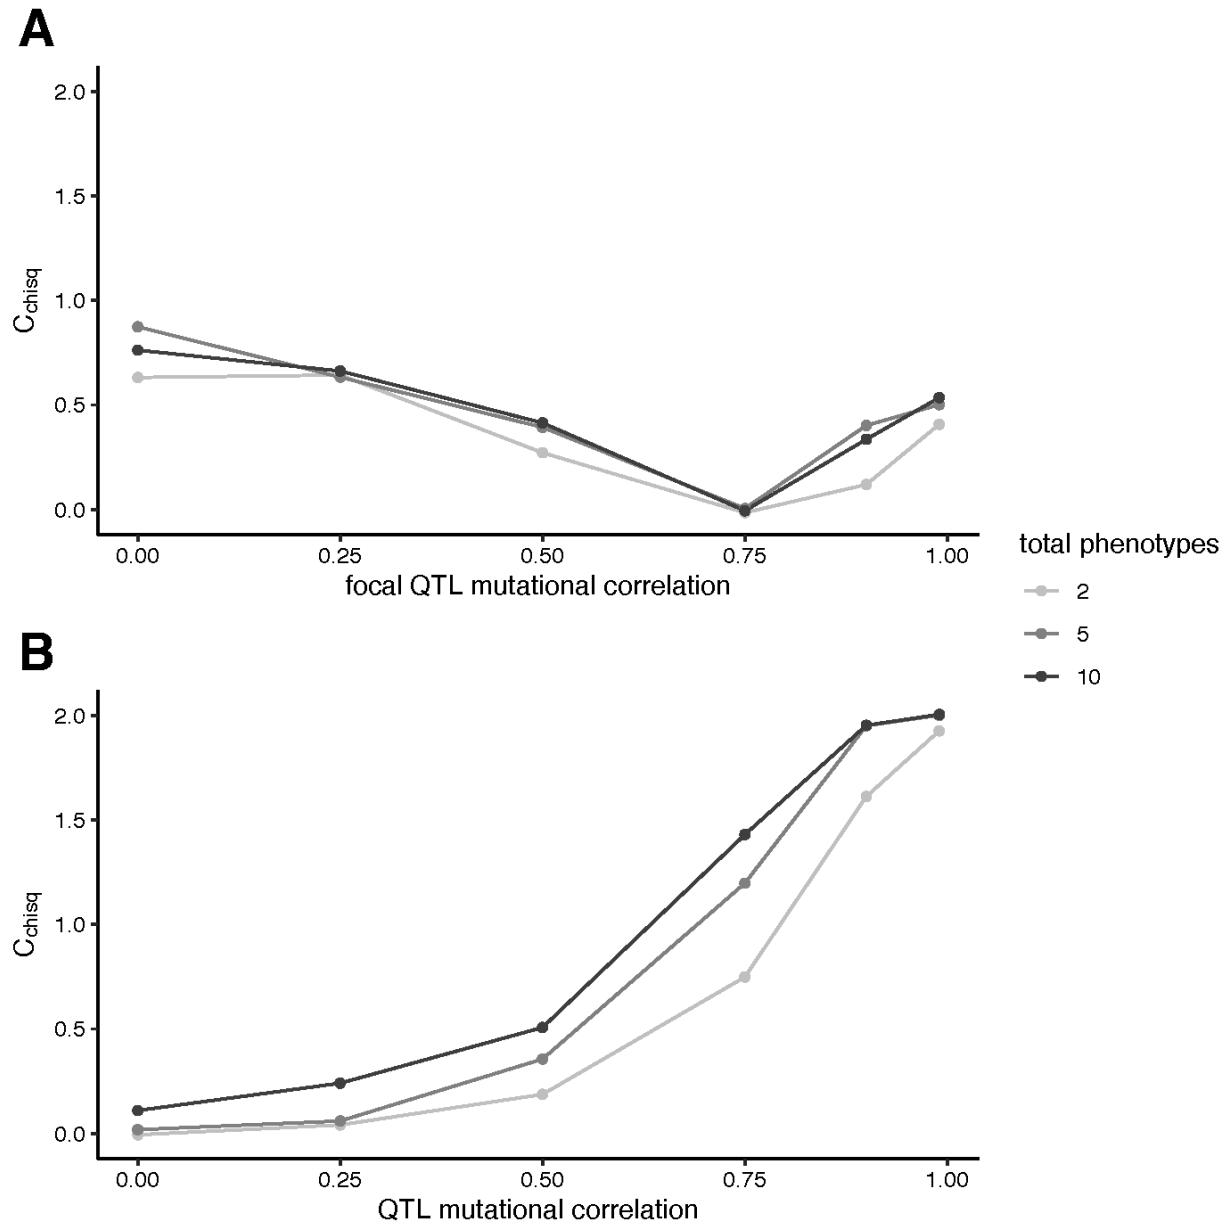

268

269 **Figure 5.** Repeatability ( $C_{chisq}$ ) against focal QTL mutational correlation where the non-focal QTL  
270 mutational correlation = 0.75 (A) and repeatability against QTL mutational correlation where all QTL share  
271 the same mutational correlation, but the focal QTL affects the divergent phenotype ( $Z_1$ ) and one fewer  
272 non-divergent phenotypes than the non-focal QTL (B). Shades indicate the total number of phenotypes in  
273 the simulation (two with one non-divergent phenotype, five with four non-divergent phenotypes and ten  
274 with nine non-divergent phenotypes). These simulations use a migration rate of 0.005 and an  $\sigma^2$  of 0.1,  
275 and were run for 20,000 generations.

## 276 Discussion

277 Empirical observations of convergent genetic evolution are common (reviewed in [5]), but in  
278 many ways at odds with some models of complex trait architecture. In this study we used  
279 simulations to understand the factors that could be varied at a QTL to produce convergent  
280 evolutionary patterns. Firstly, we demonstrated that an increase in effect magnitude ( $\sigma^2$ ) of a  
281 QTL will produce patterns of repeatability, which is consistent with previous theoretical [24] and  
282 empirical observations (e.g. [28,29]). Both mutational correlations and migration can force  
283 adaptation away from phenotypic optima along 'genetic lines of least resistance' [27,30].  
284 Correspondingly, we see a reduction in trait divergence between demes as mutational  
285 correlation or migration is increased (fig. 2B). However, while increasing mutational correlations  
286 reduce repeatability, migration amplifies it (fig. 3A).

287  
288 We also investigated how varying pleiotropy at the focal QTL affected signatures of  
289 repeatability. Pleiotropy was varied in two ways: a relaxation in mutational correlations with a  
290 non-divergent phenotype, or a reduction in the number of phenotypes that a QTL mutation  
291 affects. Congruent with the findings of Chevin, Martin & Lenormand [24] who examined single  
292 populations, we found that variation in different forms of pleiotropy will increase the likelihood  
293 that repeatability will emerge for loci governing local adaptation. Specifically, we find that a  
294 reduction in pleiotropic dimensionality at a focal QTL produces greater levels of repeatability  
295 than a relaxation in mutational correlations, a pattern that is robust to increases in trait  
296 dimensionality in our models (fig. 6A c.f. B).

297  
298 Whereas Chevin, Martin & Lenormand [24] used a single phenotype in a single deme under  
299 divergent selection, our simulations used two demes linked by varying amounts of migration.  
300 This models a common situation in local adaptation: Individuals in one population may  
301 experience local environmental shifts; they must therefore adapt to new optima for some  
302 phenotypes, while retaining existing optima at others. Previously, Yeaman & Whitlock [22]  
303 demonstrated that migration concentrates the genetic architecture of local adaptation and favors  
304 alleles of larger effect. Correspondingly, we find that migration increases the observed  
305 repeatability arising from effect-magnitude variation (fig. 3, fig. S1), as high migration rates  
306 favour adaptation by larger effect alleles, which can most readily occur at the focal QTL when  
307 pleiotropy is present. But this effect breaks down as migration increases further, at which point  
308 swamping tends to prevent persistent divergence. We also find that migration increases  
309 repeatability arising from pleiotropic variation (fig. S3). This is because repeatability is driven by

310 the net effect of selection on a QTL. Under migration-selection balance those QTL with larger  
311 net beneficial effects (weaker mutational correlations) will be maintained as differentiated  
312 (unless migration is so high that no mutations meet the threshold).

313

314 Guillaume [27] utilized a similar two-patch design to investigate the effects of pleiotropy and  
315 migration on population divergence of phenotypes. He demonstrated that combinations of  
316 migration and pleiotropy can drive divergence between demes at phenotypes that share the  
317 same optima in both demes, as long as the phenotypes are sufficiently correlated with  
318 divergently selected phenotypes. We observe similar patterns in our simulations: Increasing  
319 levels of mutational correlations and migration reduce differentiation between demes at the  
320 divergent phenotype, and increase differentiation between demes in phenotypes not under  
321 divergent selection (fig. S3). Perhaps surprisingly, we show that this reduced phenotypic  
322 differentiation does not necessarily limit genetic repeatability, as high  $C_{chisq}$  values are observed  
323 in simulations where pleiotropy and migration have substantially limited the divergence between  
324 demes (fig. 2; 3).

325

326 Our simulations provide important insights for studies of local adaptation. Firstly, in the presence  
327 of adequate levels of migration, repeatability is expected to occur across lineages undergoing  
328 local adaptation to similar optima, even if strong pleiotropic relationships oppose the direction of  
329 divergence in phenotypic space (fig. 3). Secondly, repeated use of a QTL down multiple  
330 lineages may arise because the QTL has a disproportionately large effect size (fig. 3), but also  
331 because pleiotropy at the QTL (either the amount of correlation between traits or the number of  
332 traits affected) is relaxed (fig. 4; 5). Finally, for mutational correlations between divergent and  
333 non-divergent traits to influence repeatability, the correlations must be high, so that fortuitous  
334 pleiotropy-breaking mutations are substantially limited (fig. S2).

335

336 However, our simulations make a number of assumptions that are almost certainly violated in  
337 natural populations exhibiting evolutionary convergence. Firstly, we treat each simulation  
338 replicate as if it were a different species representing an independent bout of adaptation, and  
339 we assume complete orthology between QTL in replicates and that orthologous QTL retain  
340 corresponding effect magnitude and pleiotropic properties. In nature, divergence between  
341 species limits studies of convergence to the orthologous portions of their genomes and the  
342 effects of adaptation in non-orthologous regions has not been addressed here. Secondly, we  
343 have simulated both the initial phenotypic optima (to which both demes start our simulations

344 adapted) and the divergent phenotypic optima as identical between replicates. Populations  
345 adapting to similar environments will not share identical phenotypic optima, which is important  
346 for the interpretation of our results, as Thompson, Osmond & Schluter [31] observed that  
347 repeatability declines rapidly as the angle between phenotypic optima increases, a pattern that  
348 is exacerbated by increased trait dimensionality. Furthermore variation between QTL in  
349 mutation rate, retention of standing variation and patterns of linkage disequilibrium may all affect  
350 the likelihood of repeatability, but we have held these parameters constant in our simulations.

351  
352 The simulations presented here also use a simplified genome architecture: four QTL with  
353 uniform properties and a single QTL with aberrant properties, and between two and ten traits.  
354 This system pales in comparison to the thousands of genes (exhibiting near-global pleiotropy)  
355 which contribute to traits under the omnigenic model [8,13]. Contrastingly, a metaanalysis of  
356 gene knockout experiments in *Saccharomyces cerevisiae*, *Caenorhabditis elegans* and *Mus*  
357 *musculus* [32] estimated pleiotropy to be far less pervasive: a median gene affects only one to  
358 nine percent of traits. Wang, Liao & Zhang [32] also detected significant signals of modular  
359 pleiotropy (where subsets of genes affect subsets of traits), which would serve to simplify the  
360 architecture available for evolutionary convergence. Simple genetic architecture enhances  
361 repeatability at a genome-wide level, and this study suggests that an even more modular  
362 architecture at some QTL will act to further magnify repeatability. While the nature of pleiotropic,  
363 quantitative traits in higher organisms remains unresolved, we expect our simple model to be  
364 applicable to more complex architectures [6], and repeating our simulations on models with 20  
365 QTL yields comparable results (fig. S4).

366 **Supplementary figures**

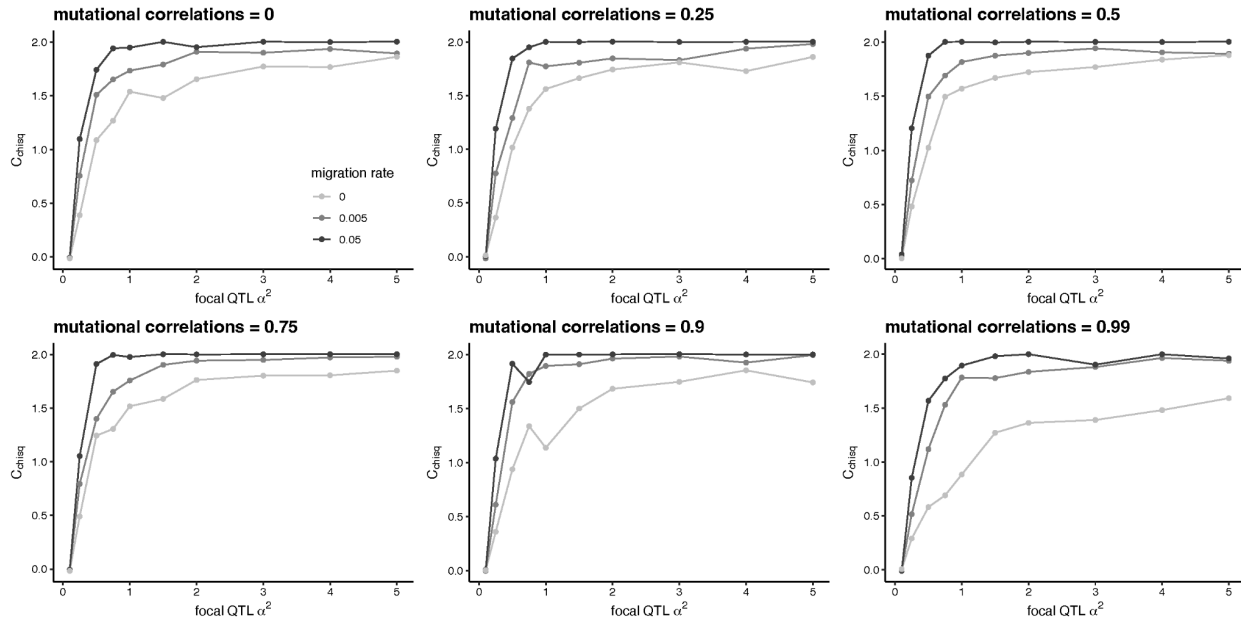

367

368 **Figure S1.** Repeatability ( $C_{chisq}$ ) in  $Z_1$  against focal QTL  $\alpha^2$  where the  $\alpha^2$  for non-focal QTL is 0.1. These  
369 simulations use two phenotypes (one divergent and one non-divergent), and were run for 20,000  
370 generations.

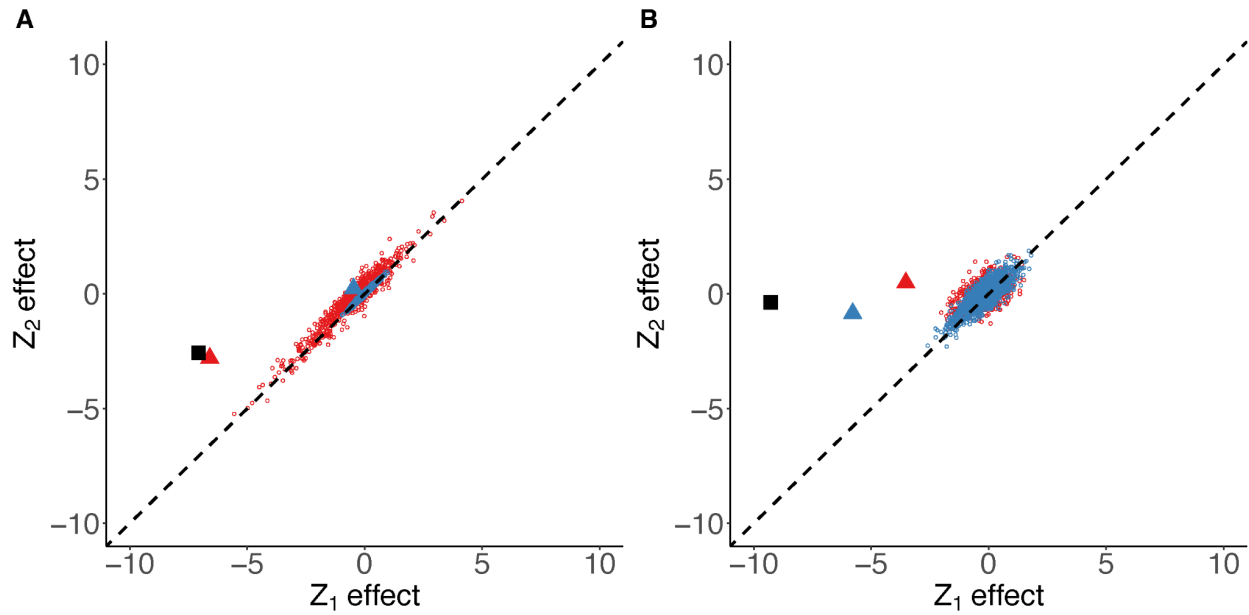

371  
372 **Figure S2.** Phenotypic effects for all mutations occurring in  $d_2$  across 100 replicates for single  
373 combinations of parameters (A: two phenotypes; five QTL; focal QTL  $\sigma^2 = 5$ ; non-focal QTL  $\sigma^2 = 0.1$ ;  
374 mutational correlations = 0.99; migration rate = 0.005; B: two phenotypes; five QTL;  $\sigma^2 = 0.5$ ; focal QTL  
375 mutational correlations = 0.75; non-focal QTL mutational correlations = 0.9; migration rate = 0.005). Red  
376 points represent mutations at the focal QTL; blue points represent mutations at non-focal QTL. The mean  
377 divergence across replicates for focal and non-focal QTL is represented by red and blue triangles  
378 respectively, and the mean overall divergence by the black square.



379

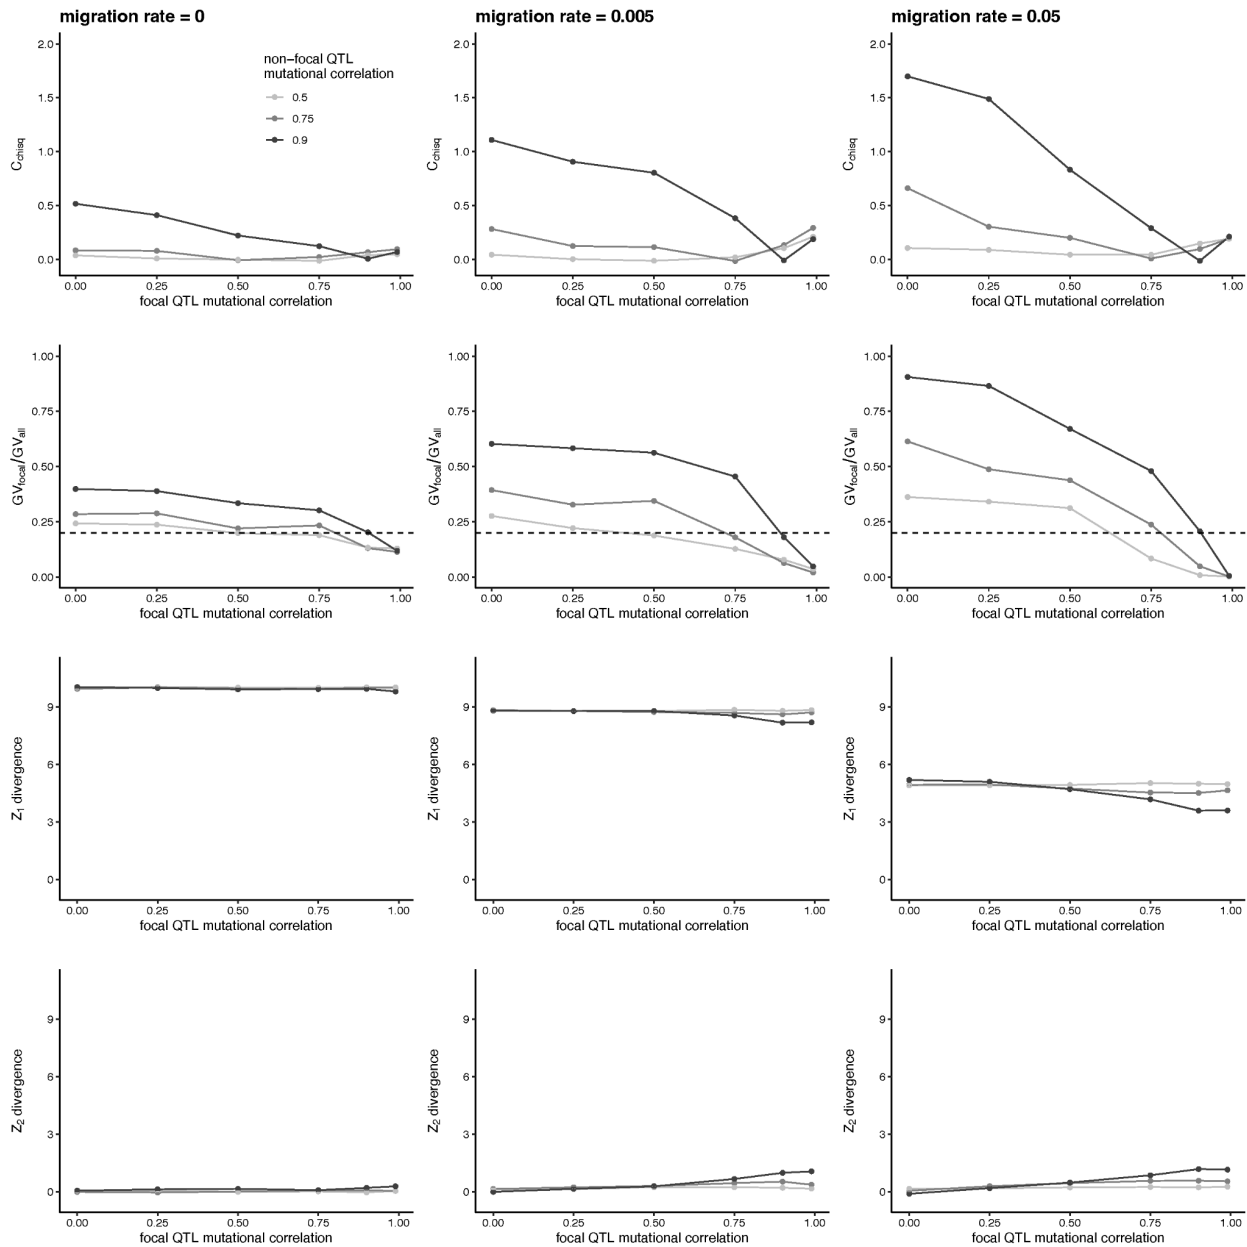

380

381 **Figure S3.** Repeatability ( $C_{\chi^2}$ ) in  $Z_1$  against focal QTL mutational correlation for varying values of non-  
 382 focal QTL mutation correlation (top row), the mean proportion of all  $GV$  explained by  $GV$  at the focal QTL  
 383 (second row), and divergence between demes in  $Z_1$  (third row) and  $Z_2$  (bottom row). These simulations  
 384 use an  $\sigma^2$  of 0.5 and two phenotypes (one divergent and one non-divergent), and were run for 20,000  
 385 generations.

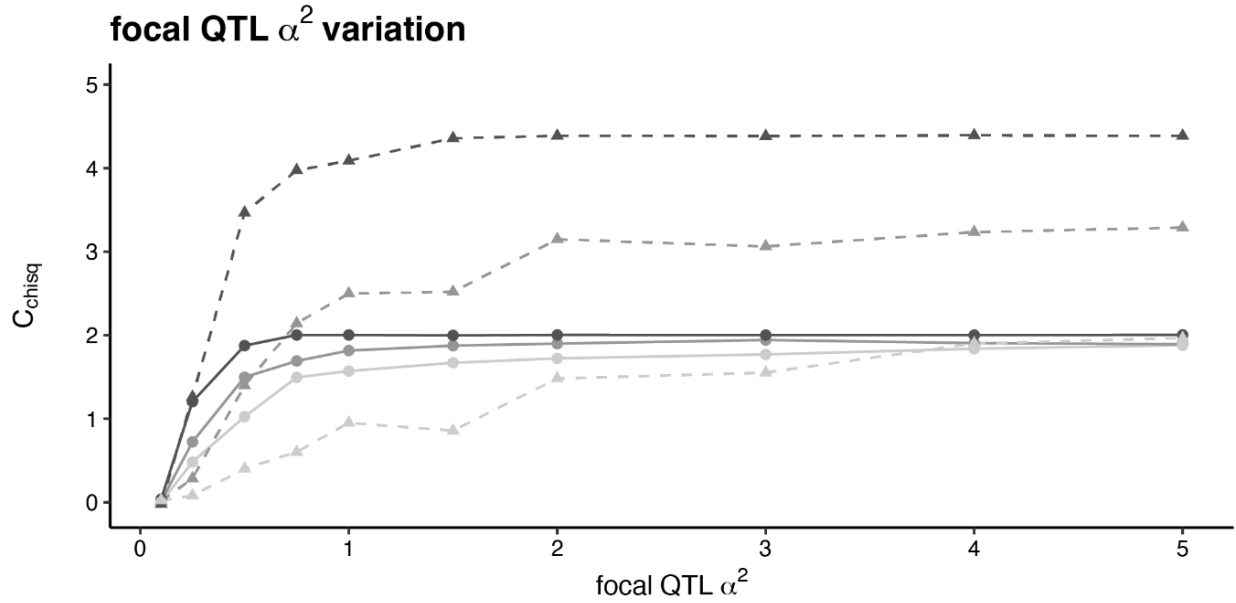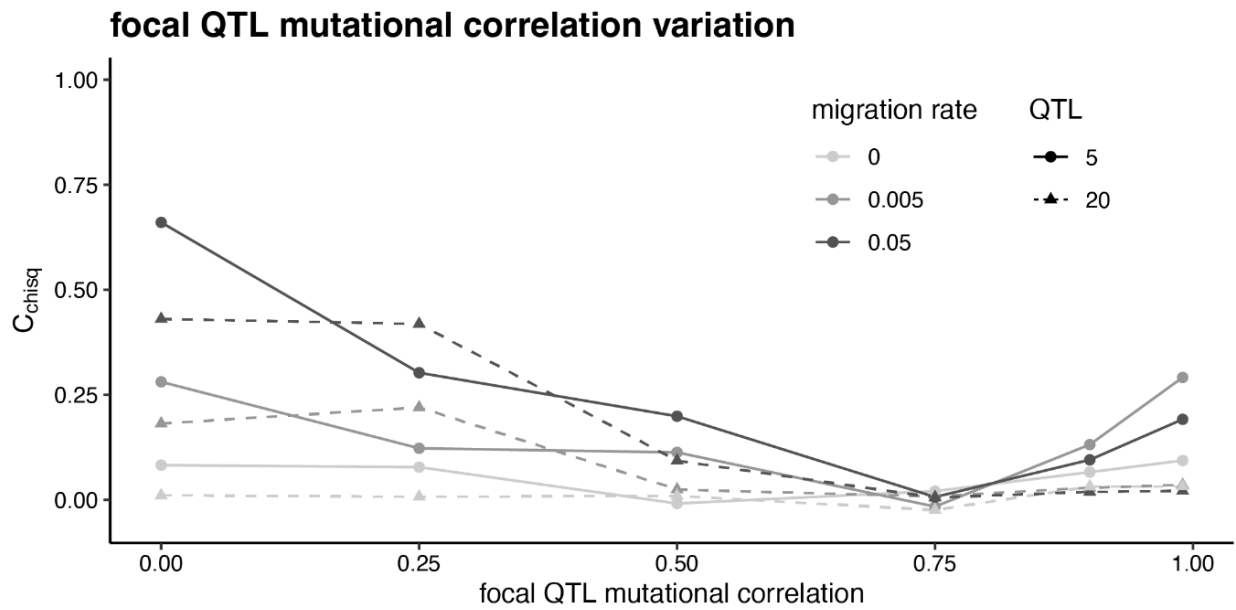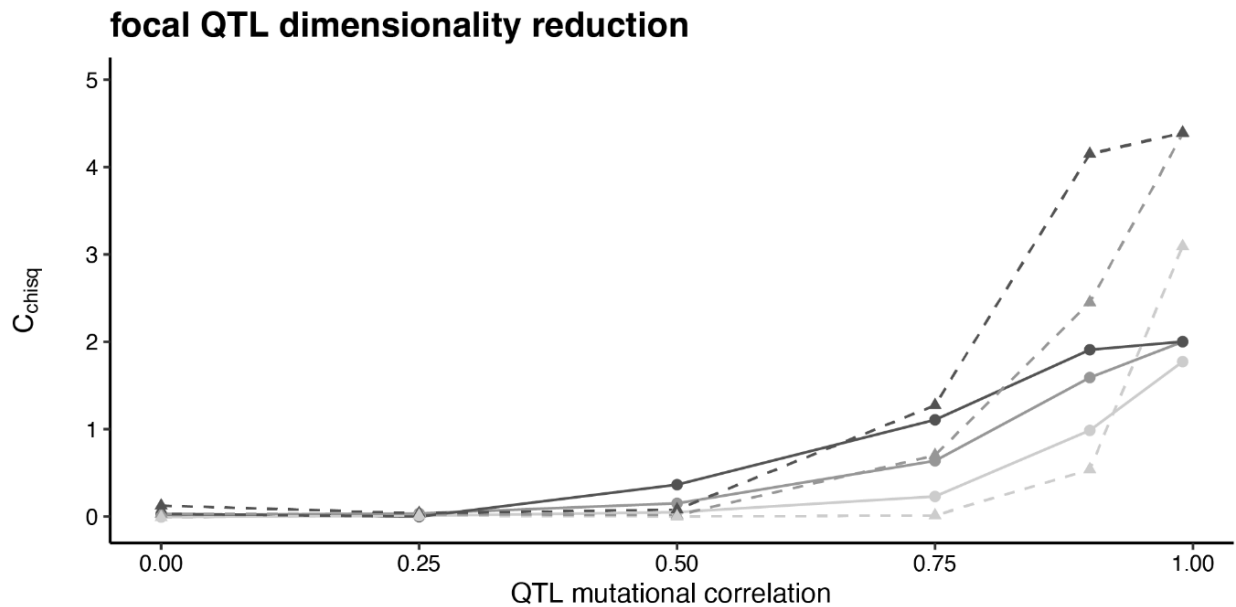

387 **Figure S4.** Effects of increasing the number of QTL modelled from five (solid lines, circle points) to 20  
388 (dashed lines, triangle points). In the top pane we examine effect-magnitude variation at the focal QTL (as  
389 in fig. 2), with mutational correlations for all QTL fixed at 0.5. In the middle pane we examine mutational  
390 correlation variation at the focal QTL (as in fig. 4), with mutational correlations at non-focal QTL of 0.75  
391 and  $\sigma^2$  at 0.5. In the lower pane we examine a reduction in dimensionality at the focal QTL (as in fig. 5B),  
392 where the total number of phenotypes is two and  $\sigma^2$  is 0.5.

## 393 References

- 394 1. Chan YF *et al.* 2010 Adaptive evolution of pelvic reduction in sticklebacks by recurrent deletion of a  
395 Pitx1 enhancer. *Science* **327**, 302–305.
- 396 2. Yeaman S *et al.* 2016 Convergent local adaptation to climate in distantly related conifers. *Science*  
397 **353**, 1431–1433.
- 398 3. Bohutínská M, Vlček J, Yair S, Laenen B, Konečná V, Fracassetti M, Slotte T, Kolář F. 2021  
399 Genomic basis of parallel adaptation varies with divergence in Arabidopsis and its relatives. *Proc.*  
400 *Natl. Acad. Sci. U. S. A.* **118**. (doi:10.1073/pnas.2022713118)
- 401 4. Tittes S, Lorant A, McGinty S, Doebley JF, Holland JB, de Jesus Sánchez-González J, Seetharam A,  
402 Tenaillon M, Ross-Ibarra J. 2021 Not so local: the population genetics of convergent adaptation in  
403 maize and teosinte. *bioRxiv.* , 2021.09.09.459637. (doi:10.1101/2021.09.09.459637)
- 404 5. Conte GL, Arnegard ME, Peichel CL, Schluter D. 2012 The probability of genetic parallelism and  
405 convergence in natural populations. *Proc. Biol. Sci.* **279**, 5039–5047.
- 406 6. Yeaman S, Gerstein AC, Hodgins KA, Whitlock MC. 2018 Quantifying how constraints limit the  
407 diversity of viable routes to adaptation. *PLoS Genet.* **14**, e1007717.
- 408 7. Fisher RA. 1919 XV.—The Correlation between Relatives on the Supposition of Mendelian  
409 Inheritance. *Earth Environ. Sci. Trans. R. Soc. Edinb.* **52**, 399–433.
- 410 8. Boyle EA, Li YI, Pritchard JK. 2017 An Expanded View of Complex Traits: From Polygenic to  
411 Omnigenic. *Cell* **169**, 1177–1186.
- 412 9. Fisher RA. 1930 *The Genetical Theory of Natural Selection*. The Clarendon Press.
- 413 10. Visscher PM, Wray NR, Zhang Q, Sklar P, McCarthy MI, Brown MA, Yang J. 2017 10 Years of  
414 GWAS Discovery: Biology, Function, and Translation. *Am. J. Hum. Genet.* **101**, 5–22.
- 415 11. Kimura M. 1983 *The Neutral Theory of Molecular Evolution*. Cambridge University Press.
- 416 12. Orr HA. 1998 The population genetics of adaptation: The distribution of factors fixed during adaptive  
417 evolution. *Evolution* **52**, 935–949.
- 418 13. Liu X, Li YI, Pritchard JK. 2019 Trans Effects on Gene Expression Can Drive Omnigenic Inheritance.  
419 *Cell* **177**, 1022–1034.e6.
- 420 14. Orr HA. 2005 The probability of parallel evolution. *Evolution* **59**, 216–220.
- 421 15. McKenzie JA, Batterham P. 1994 The genetic, molecular and phenotypic consequences of selection  
422 for insecticide resistance. *Trends Ecol. Evol.* **9**, 166–169.
- 423 16. Shapiro MD, Marks ME, Peichel CL, Blackman BK, Nereng KS, Jónsson B, Schluter D, Kingsley DM.  
424 2004 Genetic and developmental basis of evolutionary pelvic reduction in threespine sticklebacks.  
425 *Nature* **428**, 717–723.
- 426 17. Doebley J. 2004 The genetics of maize evolution. *Annu. Rev. Genet.* **38**, 37–59.
- 427 18. Maynard Smith J, Haigh J. 1974 The hitch-hiking effect of a favourable gene. *Genetics Research* **23**,  
428 23–35.
- 429 19. Kaplan NL, Hudson RR, Langley CH. 1989 The 'hitchhiking effect' revisited. *Genetics* **123**, 887–899.

- 430 20. Barghi N, Schlötterer C. 2020 Distinct Patterns of Selective Sweep and Polygenic Adaptation in  
431 Evolve and Resequencing Studies. *Genome Biol. Evol.* **12**, 890–904.
- 432 21. Schluter D, Marchinko KB, Arnegard ME, Zhang H, Brady SD, Jones FC, Bell MA, Kingsley DM.  
433 2021 Fitness maps to a large-effect locus in introduced stickleback populations. *Proc. Natl. Acad.  
434 Sci. U. S. A.* **118**. (doi:10.1073/pnas.1914889118)
- 435 22. Yeaman S, Whitlock MC. 2011 The genetic architecture of adaptation under migration-selection  
436 balance. *Evolution* **65**, 1897–1911.
- 437 23. Boyle R. 1665 An account of a very odd monstrous calf. *Philosophical Transactions of the Royal  
438 Society of London* **1**, 10–10.
- 439 24. Chevin L-M, Martin G, Lenormand T. 2010 Fisher’s model and the genomics of adaptation: restricted  
440 pleiotropy, heterogenous mutation, and parallel evolution. *Evolution* **64**, 3213–3231.
- 441 25. Hether TD, Hohenlohe PA. 2014 Genetic regulatory network motifs constrain adaptation through  
442 curvature in the landscape of mutational (co)variance. *Evolution* **68**, 950–964.
- 443 26. Haller BC, Messer PW. 2019 SLiM 3: Forward Genetic Simulations Beyond the Wright–Fisher Model.  
444 *Mol. Biol. Evol.* **36**, 632–637.
- 445 27. Guillaume F. 2011 Migration-induced phenotypic divergence: the migration-selection balance of  
446 correlated traits. *Evolution* **65**, 1723–1738.
- 447 28. Rosenblum EB, Hoekstra HE, Nachman MW. 2004 Adaptive reptile color variation and the evolution  
448 of the Mc1r gene. *Evolution* **58**, 1794–1808.
- 449 29. Schlenke TA, Begun DJ. 2004 Strong selective sweep associated with a transposon insertion in  
450 *Drosophila simulans*. *Proc. Natl. Acad. Sci. U. S. A.* **101**, 1626–1631.
- 451 30. Schluter D. 1996 ADAPTIVE RADIATION ALONG GENETIC LINES OF LEAST RESISTANCE.  
452 *Evolution* **50**, 1766–1774.
- 453 31. Thompson KA, Osmond MM, Schluter D. 2019 Parallel genetic evolution and speciation from  
454 standing variation. *Evol Lett* **3**, 129–141.
- 455 32. Wang Z, Liao B-Y, Zhang J. 2010 Genomic patterns of pleiotropy and the evolution of complexity.  
456 *Proc. Natl. Acad. Sci. U. S. A.* **107**, 18034–18039.
